# Supplementary material for: Gcn5 facilitates Pol II progression, rather than recruitment to nucleosome-depleted stress promoters, in Schizosaccharomyces pombe
Source: PubMed Central journal article supplement — Nucleic Acids Res. 2011 Apr 22;39(15):6369–79. doi: 10.1093/nar/gkr255 (PMC3159446; doi:10.1093/nar/gkr255), 2011-04-22
Supplement: supp_gkr255_nar-02934-m-2010-File009.pdf [file supp_gkr255_nar-02934-m-2010-File009.pdf]

## SUPPLEMENTARY FIGURE LEGENDS – Sansó et al. 2011

**Supplementary Figure S1.** Atf1-dependent Gcn5 recruitment to stress promoters induces histone acetylation and nucleosome eviction along the *gpd1* gene. **(A)** Gcn5 recruitment depends on Sty1. Cultures of strains HMP47 (*gcn5-HA*) and MS208 (*gcn5-HA Δsty1*) were treated (+) or not (-) with 1 mM H<sub>2</sub>O<sub>2</sub> for 15 min. ChIP experiments using anti-HA antibodies, coupled to quantification by real-time PCR, were performed using primers covering only promoter regions (*gpd1*, *ctt1*, *hsp9* and *srx1* promoters; left panel), or promoter (prom), coding (ORF) and termination (term) sequences of the *gpd1* (central panel) or *ctt1* (right panel) genes. Primers of an intergenic region were used as a negative control (control). Error bars for all ChIP experiments were calculated from biological triplicates. Significant difference between Gcn5-HA binding to ORF before and after stress in wild-type cells was determined by the Student's t-test (\*P<0.05). **(B)** Gcn5 is physically recruited to *gpd1* in an Atf1-dependent manner. Cultures of strains HMP47 (*gcn5-HA*) and MS176 (*gcn5-HA Δatf1*) were treated (+) or not (-) with 1 mM H<sub>2</sub>O<sub>2</sub> for 15 min. ChIP experiments using anti-HA antibodies were performed as described above, using primer pairs corresponding to the promoter (prom), coding (ORF) and terminal region (term) of the *gpd1* gene. **(C)** Gcn5 promotes histone H3 acetylation upon stress imposition in coding region of the *gpd1* gene. Cultures of strains 972 (WT) and MS112 (*Δgcn5*) were treated (+) or not (-) with 1 mM H<sub>2</sub>O<sub>2</sub> for 15 min. ChIP experiments using antibodies specific for acetylated lysines 9 and 14 of histone H3 (H3Ac) or against unmodified C-terminal domain of H3 (H3) were performed as described above, using primers covering promoter (prom), coding (ORF) and termination (term) sequences of the *gpd1* gene. The percentage of immunoprecipitation of acetylated H3 versus total H3 is indicated (% IP H3Ac/H3). Significant difference between wild-type versus *Δgcn5* cells at ORF upon stress was determined by the Student's t-test (\*P<0.05). **(D)** Gcn5 promotes nucleosome eviction at the *gpd1* locus. The same experiment as in Supplementary Figure S1C is represented here as the percentage of total H3 immunoprecipitated (% IP H3).

**Supplementary Figure S2.** Lack of Gcn5 impairs Pol II progression, but not Pol II recruitment to promoters. **(A)** Pol II recruitment to promoters depends on Sty1. Strains CN011 (*rpb1-HA*

WT) and CN009 (*rpb1-HA Δsty1*), expressing Rpb1-HA, were cultured and treated (+) or not (-) with 1 mM H<sub>2</sub>O<sub>2</sub> for 15 min. ChIP experiments were performed as in Supplementary Figure S1A using primers of promoter regions. **(B)** Pol II recruitment to promoters is not affected in cells lacking Gcn5. Cultures of strains CN011 (*rpb1-HA*) and MS52 (*rpb1-HA Δgcn5*) were treated (+) or not (-) with 1 mM H<sub>2</sub>O<sub>2</sub> for 15 min. ChIP experiments with anti-HA antibodies were performed as described in Supplementary Figure S1A, using primers covering promoter regions. **(C)** Pol II recruitment to coding sequences depends on Sty1. Strains and conditions as in (A), using primers of the *ctt1* gene. **(D)** Pol II recruitment to coding sequences is significantly affected in cells lacking Gcn5. Strains and conditions as in (B), using primers of the *gpd1* gene. **(E)** Phosphorylation at Ser5 of the CTD of the large Pol II subunit Rpb1. Strains 972 (WT) and MS161 (*Δgcn5*) were cultured and treated (+) or not (-) with 1 mM H<sub>2</sub>O<sub>2</sub> for 15 min. ChIP experiments with specific antibodies for phosphorylated Ser5 (Ser5-CTD) were performed as described in Supplementary Figure S1A, using primers covering the *gpd1* gene. **(F)** Phosphorylation at Ser2 of the CTD of the large Pol II subunit Rpb1. Strains and conditions as in (E), using specific antibodies for phosphorylated Ser2 (Ser2-CTD). Significant difference between wild-type *versus* *Δgcn5* cells at terminator (term) upon stress was determined by the Student's t-test (\*P<0.05).

**Supplementary Figure S3.** Short-time kinetics of Pol II progression along the *gpd1* gene: Gcn5 mediates promoter escape. Strains CN011 (*rpb1-HA*) and MS52 (*rpb1-HA Δgcn5*), expressing the large Pol II subunit Rpb1-HA, were cultured and treated or not with 1 mM H<sub>2</sub>O<sub>2</sub> for the time in seconds indicated in the figure. ChIP experiments with anti-HA antibodies were performed as described in Supplementary Figure S1A, using primers covering promoter (prom), coding (ORF) and termination (term) sequences of the *gpd1* gene.

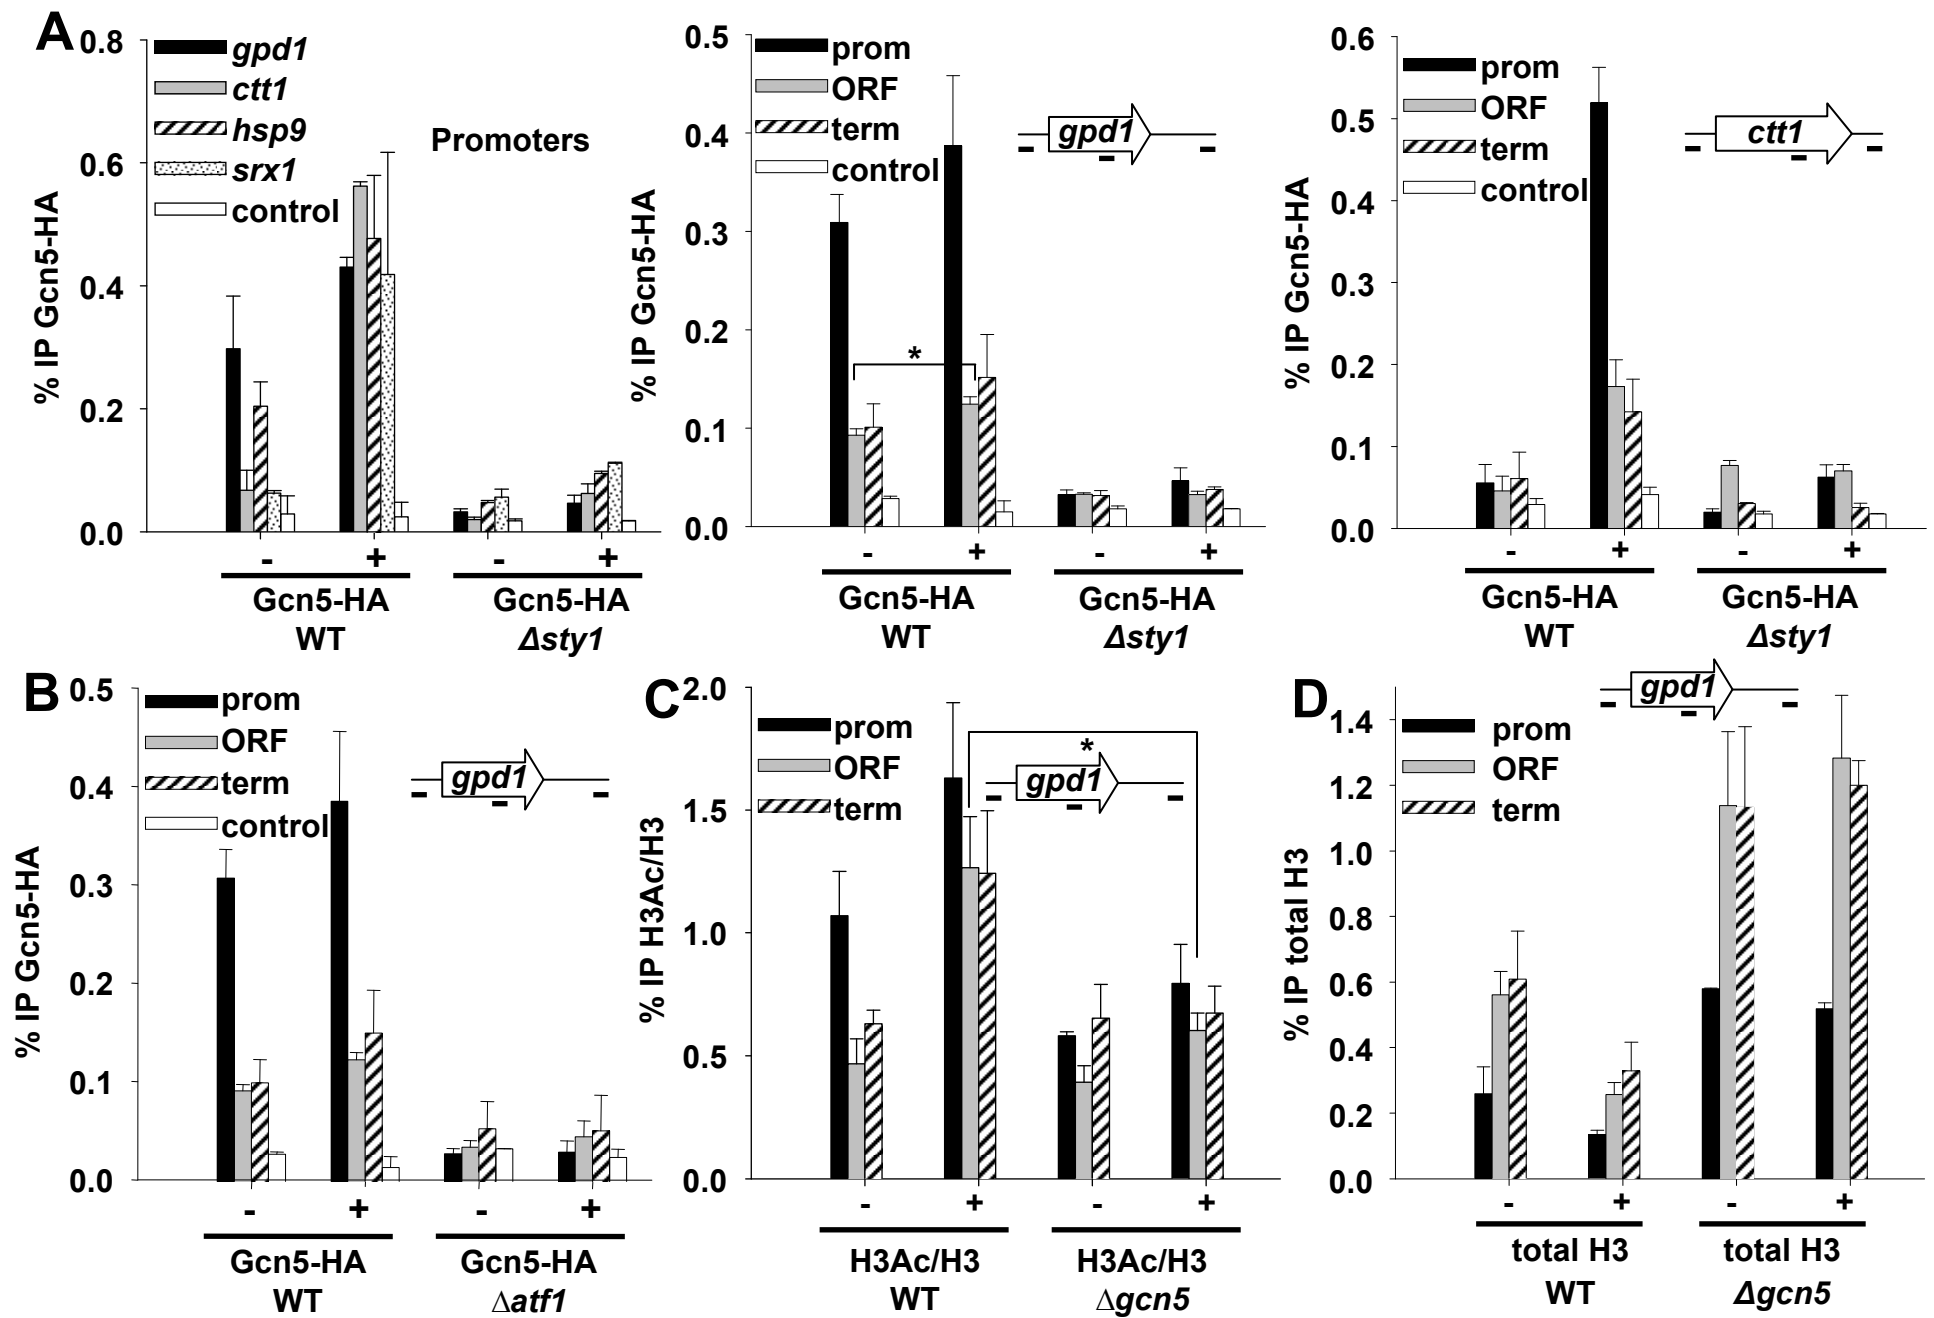

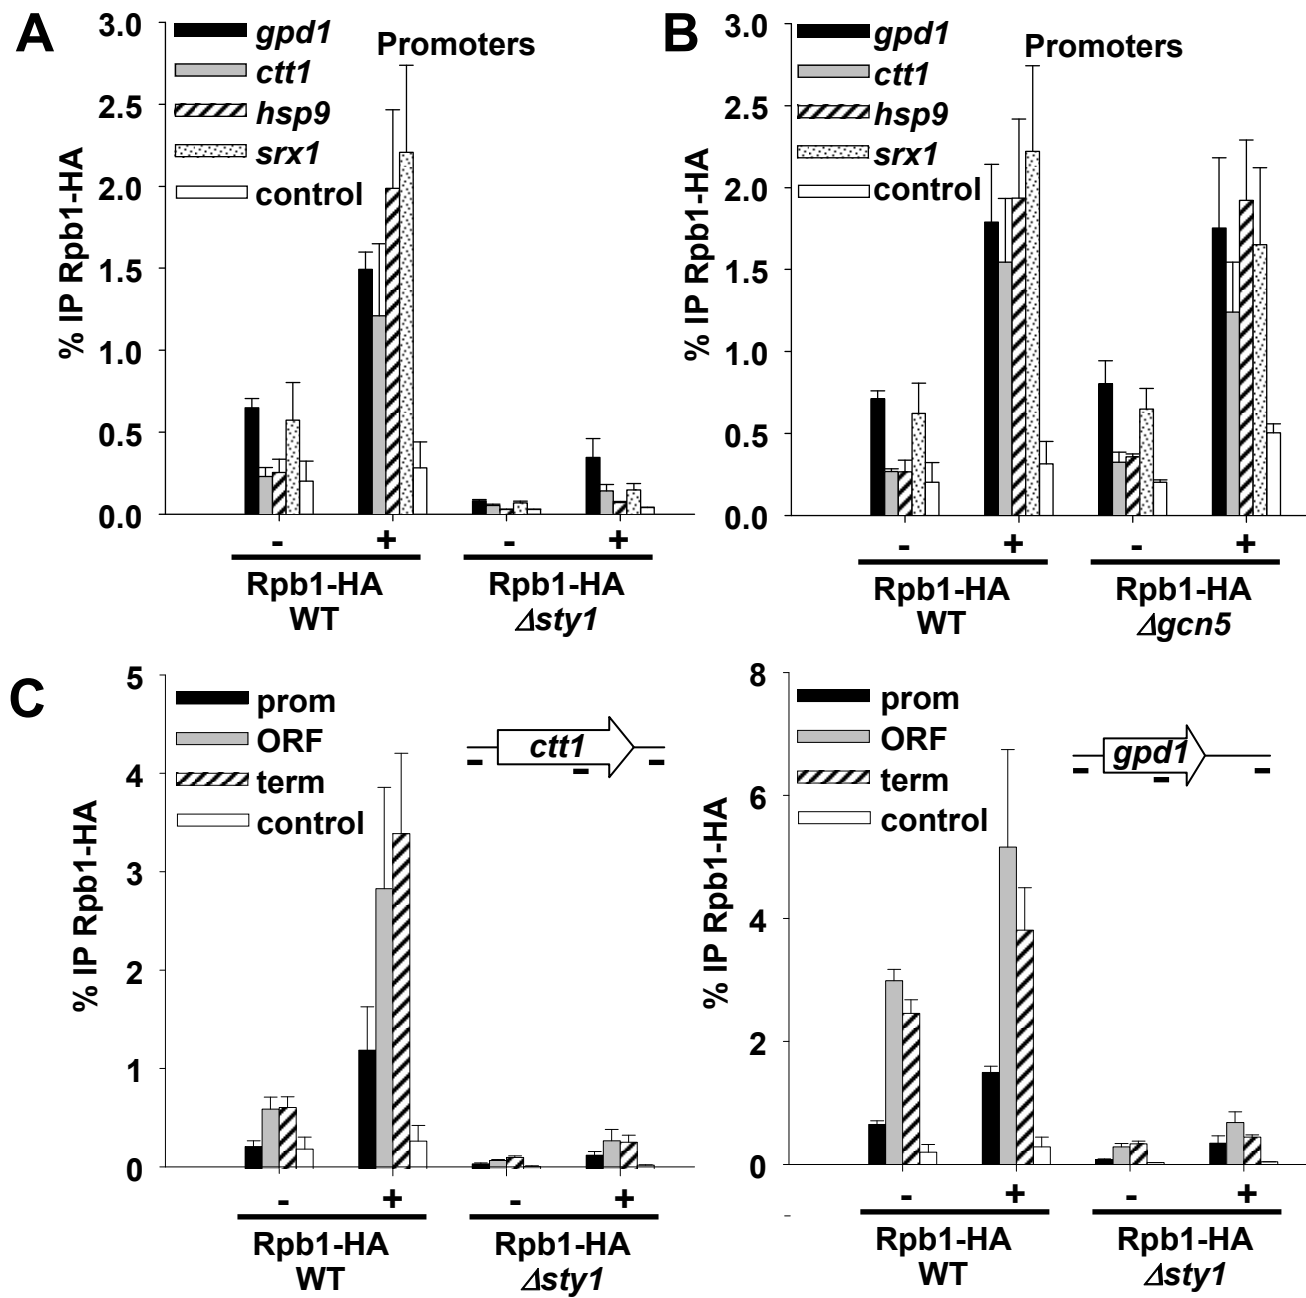

Sansó et al. Supplementary Figure S2A-C

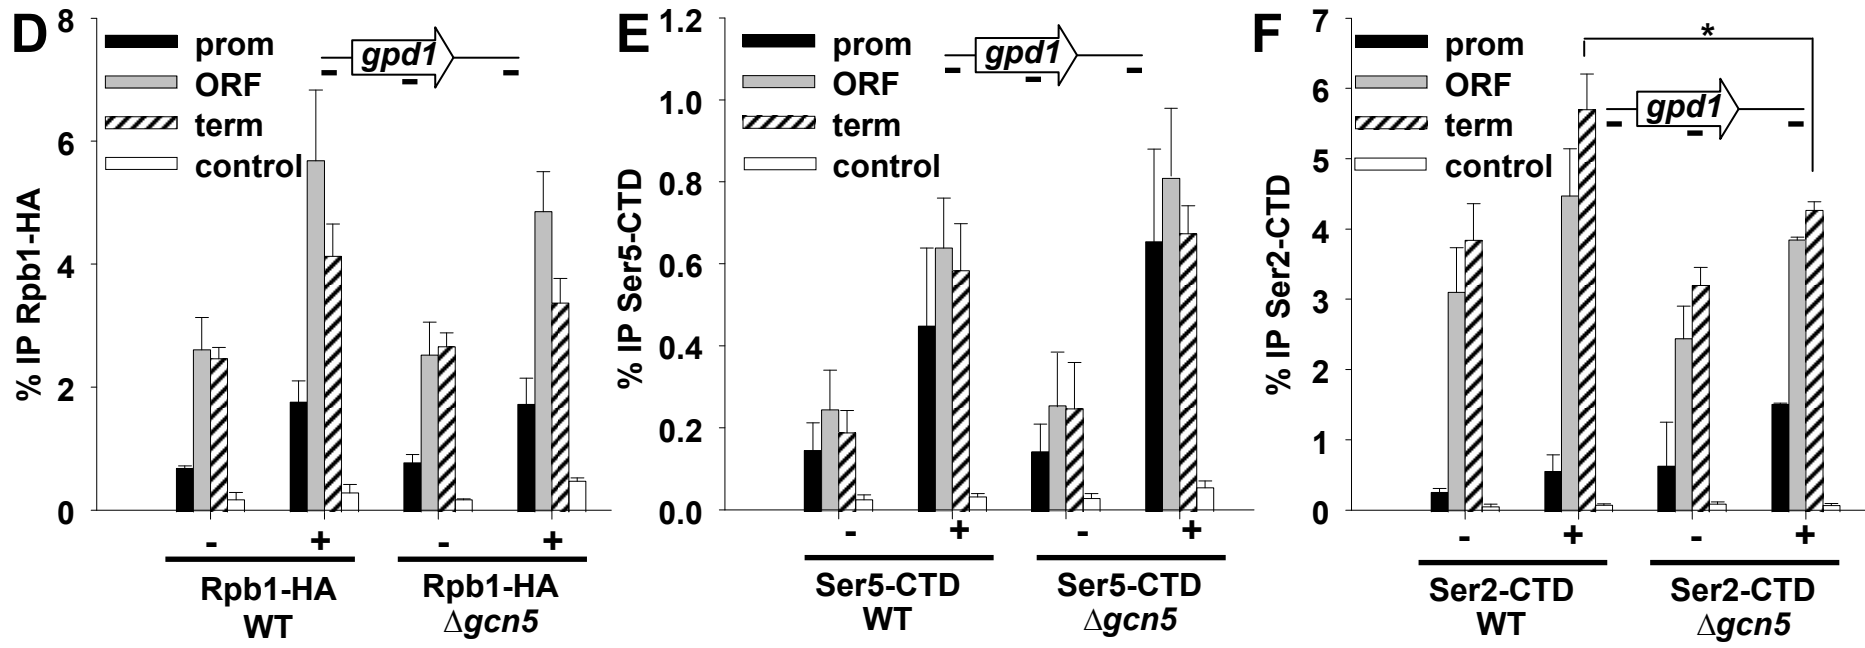

Sansó et al. Supplementary Figure S2D-F

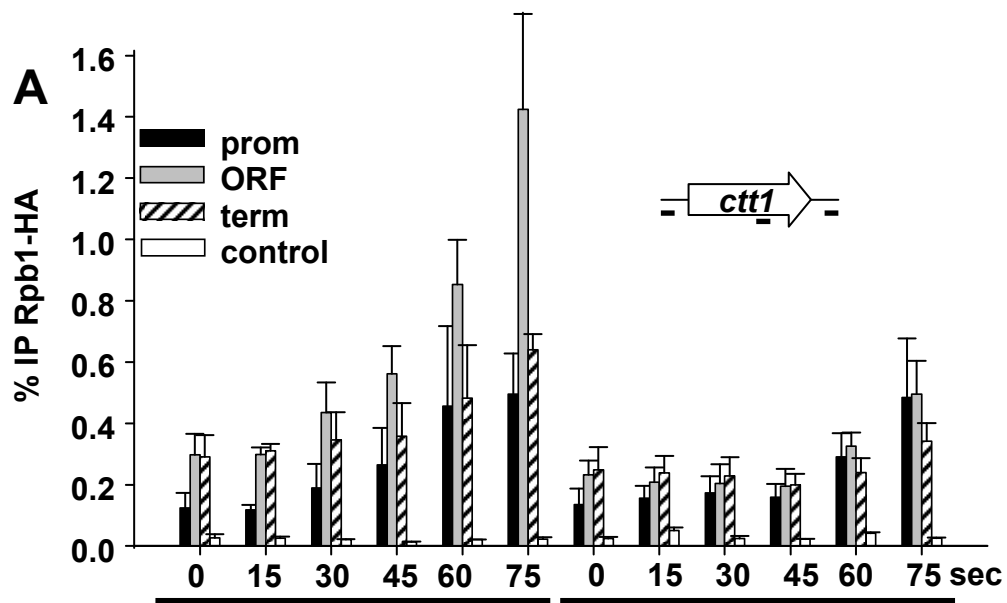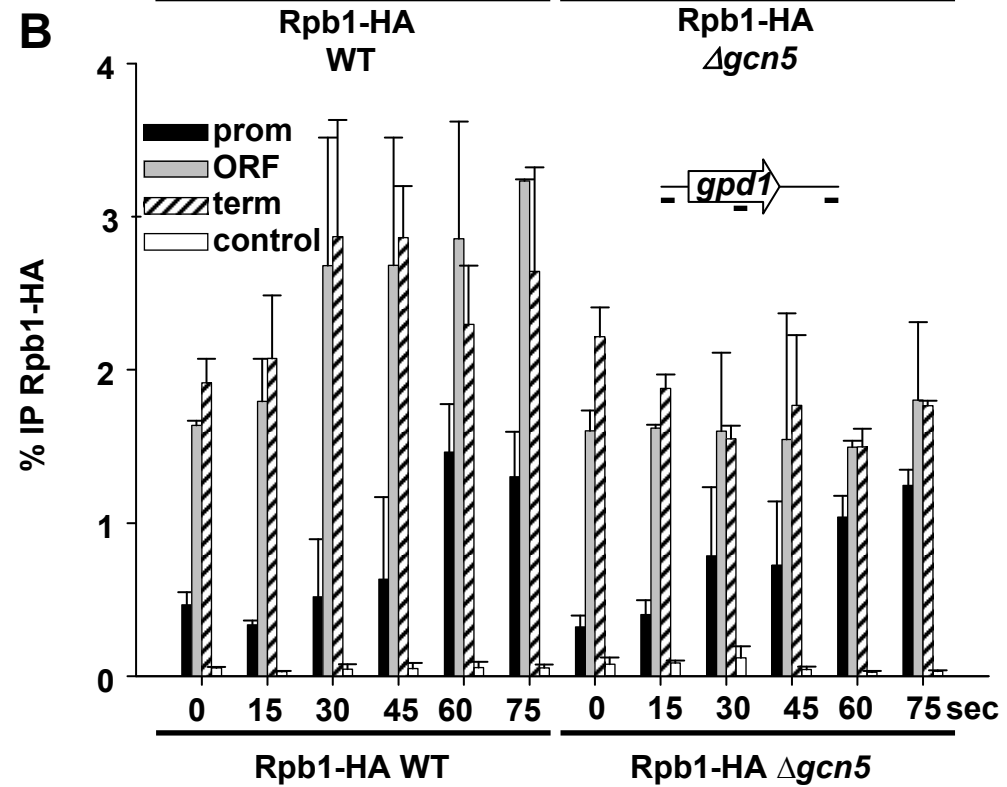

Sansó et al. Supplementary Figure S3

**Supplementary Table S1. List of the top 50 genes up-regulated in response to 0.5 mM H<sub>2</sub>O<sub>2</sub>**

| Genes names                      | Genomic<br>microarrays <sup>a</sup> | Expression<br>microarrays <sup>b</sup> | PCR<br>microarrays <sup>c</sup> | Chromosome | Strand | ORF left<br>position <sup>d</sup> | ORF right<br>position <sup>d</sup> | TSS <sup>d</sup> | NDR <sup>e</sup> |
|----------------------------------|-------------------------------------|----------------------------------------|---------------------------------|------------|--------|-----------------------------------|------------------------------------|------------------|------------------|
| SPBC660.05                       | 5.6                                 | 5.5                                    | 5.4                             | II         | +      | 202536                            | 202967                             | 202302           | YES              |
| SPAC23H3.15c:SPAC25H1.01c        | 5.4                                 | 5.7                                    | 6.6                             | I          | -      | 2523629                           | 2524606                            | 2524622          | YES              |
| SPBC24C6.09c                     | 5.1                                 | 5.8                                    | 6.8                             | II         | -      | 2335262                           | 2337739                            | 2337900          | YES              |
| SPCC794.04c                      | 5.1                                 | 5.5                                    | 0.8                             | III        | -      | 248551                            | 250194                             | nd               | YES              |
| SPAC513.02                       | 4.9                                 | 5.2                                    | 4.3                             | I          | +      |                                   |                                    |                  | NO               |
| SPAC4H3.03c                      | 4.7                                 | 4.7                                    | 4.8                             | I          | -      | 3826640                           | 3828589                            | 3829200          | YES              |
| Isd90:SPBC16E9.16c               | 4.6                                 | 4.5                                    | 6.5                             | II         | -      | 1947985                           | 1950255                            | nd               | YES              |
| gut2:SPCC1223.03c                | 4.6                                 | 4.2                                    | 4.8                             | I          | -      |                                   |                                    |                  | NO               |
| SPCC70.12c:ecl1                  | 4.5                                 |                                        |                                 | III        | -      | 2355545                           | 2355787                            | nd               | YES              |
| SPAC637.03                       | 4.4                                 | 3.5                                    | 4.0                             | I          | +      |                                   |                                    |                  | NO               |
| pyp2:SPAC19D5.01                 | 4.3                                 | 5.0                                    | 5.0                             | I          | +      | 5202823                           | 5204958                            | 5202024          | YES              |
| SPCC757.03c                      | 4.1                                 | 4.2                                    | 4.7                             | III        | -      | 47741                             | 48475                              | 48486            | YES              |
| ish1:SPBC365.12c                 | 4.0                                 | 3.8                                    | 4.7                             | II         | -      | 2516249                           | 2518303                            | 2518722          | YES              |
| SPAC2H10.01                      | 3.9                                 | 4.6                                    | 0.6                             | I          | +      | 5274171                           | 5275613                            | 5273084          | YES              |
| SPAC22F8.05                      | 3.9                                 | 3.4                                    | 3.9                             | I          | +      | 4792308                           | 4794983                            | 4791890          | YES              |
| SPBC725.03                       | 3.9                                 | 4.1                                    | 5.0                             | II         | +      | 1207040                           | 1207813                            | 1207813          | YES              |
| oca2:SPCC1020.10                 | 3.7                                 | 3.6                                    | 2.5                             | III        | -      | 758901                            | 760853                             | 762606           | YES              |
| srx1:SPBC106.02c                 | 3.5                                 | 2.3                                    | 4.6                             | II         | -      | 376462                            | 376836                             | 376983           | YES              |
| SPCC1739.08c                     | 3.4                                 | 2.8                                    | 4.2                             | III        | -      | 2043282                           | 2044067                            | nd               | YES              |
| SPAC23G3.13c:SPAC22H12.01c:mug35 | 3.3                                 | 2.8                                    | 1.2                             | I          | -      | 893719                            | 894423                             | 894476           | YES              |
| SPBC725.10                       | 3.2                                 | 3.3                                    | 3.0                             | II         | +      | 1224974                           | 1225462                            | 1224587          | YES              |
| SPAC15E1.02c                     | 3.2                                 | 2.7                                    | 4.6                             | I          | -      |                                   |                                    |                  | NO               |
| ctt1:cta1:SPCC757.07c            | 3.2                                 | 3.0                                    | 4.7                             | III        | -      | 56927                             | 58465                              | 58825            | YES              |
| SPCC417.13:SPCC191.01            | 3.1                                 | 3.4                                    | 2.8                             | III        | +      | 1706461                           | 1706997                            | 1705835          | YES              |
| SPAPB1A10.05                     | 3.1                                 | 3.3                                    | -0.2                            | I          | +      |                                   |                                    |                  | NO               |
| rsv2:SPBC1105.14                 | 3.1                                 | 3.3                                    | 2.4                             | II         | +      | 3532931                           | 3534844                            | 3532931          | YES              |
| SPCP31B10.06:mug190              | 3.0                                 | 3.7                                    | 3.5                             | III        | +      | 533322                            | 536888                             | 532541           | YES              |
| SPBC1105.13c                     | 3.0                                 | 3.4                                    | 1.0                             | II         | -      | 3531760                           | 3532188                            | 3532400          | YES              |
| SPAC32A11.02c                    | 3.0                                 | 2.9                                    | 4.3                             | I          | -      | 2447948                           | 2450503                            | 2451032          | YES              |
| SPBC11C11.06c                    | 2.9                                 | 2.3                                    | 3.7                             | II         | -      | 3359360                           | 3359896                            | 3359940          | YES              |
| SPBC21C3.19                      | 2.9                                 | 2.8                                    | 4.3                             | II         | +      | 3830167                           | 3830487                            | 3830083          | YES              |
| SPAC17G6.13                      | 2.9                                 | 1.9                                    | 0.5                             | I          | +      |                                   |                                    |                  | NO               |
| SPBPB2B2.12c                     | 2.9                                 | 2.7                                    | 1.6                             | II         | -      |                                   |                                    |                  | NO               |
| SPAC23C11.06c                    | 2.9                                 | 2.7                                    | 3.6                             | I          | -      |                                   |                                    |                  | NO               |
| srk1:mkp1:SPCC1322.08            | 2.9                                 | 3.4                                    | 3.6                             | III        | +      | 1302900                           | 1304865                            | 1301970          | YES              |
| SPAC16A10.01                     | 2.8                                 | 2.6                                    | 2.0                             | I          | +      | 3077676                           | 3080168                            | nd               | YES              |

|                                 |     |     |      |     |   |         |         |         |     |
|---------------------------------|-----|-----|------|-----|---|---------|---------|---------|-----|
| SPAC26F1.04c:etr1               | 2.8 | 2.4 | 2.4  | I   | + |         |         |         | NO  |
| SPAC13C5.04                     | 2.7 | 2.1 |      | I   | + |         |         |         | NO  |
| SPAC57A7.02c:SPAC167.06c:mug143 | 2.7 | 2.9 | 3.4  | I   | + | 1550133 | 1550498 | 1550076 | YES |
| SPCC338.12                      | 2.7 | 1.5 | 3.2  | III | - | 1355276 | 1355509 | 1355596 | YES |
| SPBC20F10.03                    | 2.7 | 2.7 | 2.5  | II  | + | 3287750 | 3289090 | 3287725 | YES |
| ssa1:SPAC13G7.02c               | 2.6 | 2.8 | -0.7 | I   | - | 2295819 | 2297753 | 2297965 | YES |
| SPBC428.10                      | 2.6 | 2.5 | 3.1  | II  | + | 461306  | 463561  | 460856  | YES |
| SPCC4G3.03                      | 2.6 | 2.1 | 2.3  | III | - | 466796  | 467839  | 468100  | YES |
| SPAC57A7.05                     | 2.6 | 2.5 | 2.7  | I   | - | 1534588 | 1538601 | 1540300 | YES |
| hsp16:SPBC3E7.02c               | 2.6 | 1.5 | 0.1  | II  | - | 2660490 | 2660921 | 2660948 | YES |
| SPCC16A11.15c                   | 2.6 | 2.8 | 4.1  | III | - | 896182  | 896535  | 896915  | YES |
| cgs1:SPAC8C9.03                 | 2.5 | 2.3 | 2.4  | I   | + | 3643239 | 3644742 | 3643046 | YES |
| ntp1:SPBC660.07                 | 2.5 | 1.8 | 1.9  | II  | + | 207078  | 209285  | 206592  | YES |
| SPBC16D10.08c                   | 2.4 | 1.8 | 0.1  | II  | - | 3612359 | 3615076 | 3615254 | YES |

log2 gene inductions after 30 min in 0.5 mM H<sub>2</sub>O<sub>2</sub> measured by genomic<sup>a</sup> or expression<sup>b</sup> microarrays (Quintales et al. 2010, BMC Bioinformatics 11:136), or by PCR fragments-based microarrays<sup>c</sup> (Chen et al. 2008, Mol. Biol. Cell 19:308)

<sup>d</sup>Data for 5' UTR, 3' UTR, and TSS were extracted from Lantermann et al. 2010, Nature Struct. Mol. Biol. 17:251 and Quintales et al. 2010, BMC Bioinformatics 11:136

<sup>e</sup>The presence of NDRs was determined from data in Lantermann et al. 2010, Nature Struct. Mol. Biol. 17:251
